# Supplementary material for: Segregation of Odor Identity and Intensity during Odor Discrimination in Drosophila Mushroom Body
Source: PLOS journal article supplement (doi:10.1371/journal.pbio.0050264), 2007-09-26
Supplement: S1 (10.1371/journal.pbio.0050264.s001) [file journal.pbio.0050264.s001]

Table S1

| Flies | Concentration of MCH (v/v) | | | | Concentration of BA (v/v) | | | |
| --- | --- | --- | --- | --- | --- | --- | --- | --- |
| 0.0001 | 0.001 | 0.01 | 0.15 | 0.00004 | 0.0004 | 0.015 | 0.1 |
|  HU | 44  5 | 73  3 | 94  1 | 96  1 | 39  6 | 77  2 | 95  1 | 98  1 |
| + HU | 41  4 | 68  4 | 92  2 | 96  1 | 33  6 | 81  2 | 93  2 | 98  1 |
| +/shits | 34  6 | 66  5 | 88  3 | 95  2 | 36  6 | 68  3 | 93  1 | 96  1 |
| C309/shits | 29  6 | 58  6 | 89  2 | 95  1 | 30  6 | 62  3 | 91  3 | 95  2 |
| 247/shits | 38  6 | 63  4 | 90  3 | 93  1 | 32  7 | 69  4 | 90  2 | 95  1 |
| 201Y/shits | 27  6 | 60  6 | 88  2 | 94  2 | 35  8 | 60  4 | 89  3 | 97  1 |
| dsGq/+ | 40  5 | 72  3 | 86  2 | 96  1 | 30  4 | 72  3 | 90  2 | 97  1 |
| dsGq/C309 | 36  5 | 65  4 | 87  2 | 95  2 | 24  5 | 67  4 | 90  2 | 98  1 |
| dsGq/247 | 32  4 | 67  4 | 88  2 | 97  1 | 25  5 | 64  4 | 87  2 | 97  1 |
| dsGq/201Y | 30  7 | 63  6 | 86  2 | 97  1 | 34  5 | 70  3 | 93  2 | 98  1 |
| Gs+/C309 | 42  4 | 76  3 | 87  2 | 97  1 | 33  6 | 70  4 | 94  1 | 97  1 |
| Gs*/C309 | 36  4 | 79  2 | 84  3 | 96  1 | 28  4 | 63  3 | 94  1 | 97  1 |
| Gs+/247 | 37  5 | 73  4 | 85  2 | 97  1 | 39  5 | 71  3 | 94  1 | 98  1 |
| Gs*/247 | 31  1 | 68  4 | 82  3 | 97  1 | 33  8 | 74  4 | 92  2 | 97  1 |
| Gs+/201Y | 39  4 | 66  5 | 86  2 | 96  1 | 37  6 | 74  4 | 93  1 | 98  1 |
| Gs*/201Y | 36  5 | 72  4 | 84  2 | 97  1 | 27  5 | 69  3 | 92  1 | 98  1 |
